# Supplementary material
Source: Springer Nature journal article supplement (https://www.springermedizin.de/resource/supplementary/12967_2013_1708_MOESM4_ESM.pdf/9575182)

**A****Ovarian cancer cell lines**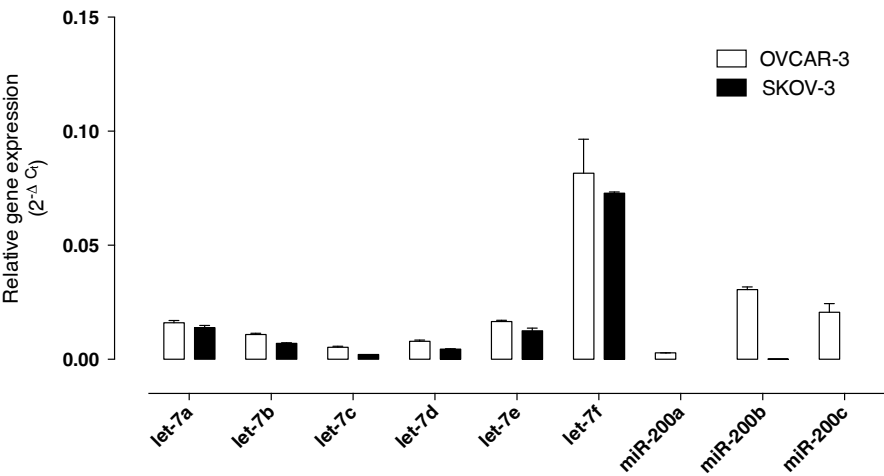**B****exosomes**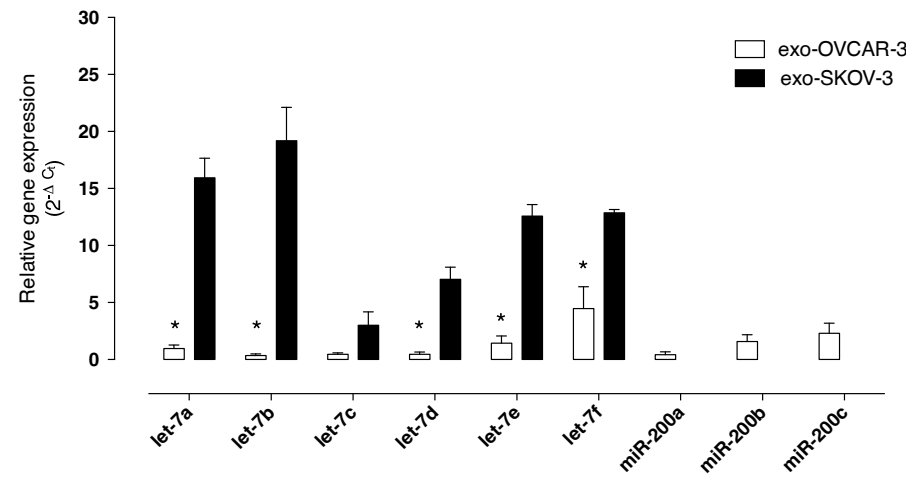

Supplement: MOESM4 [file 9575182]
